# Supplementary material for: Effects of (−)-epicatechin on hepatic triglyceride metabolism
Source: Royal Society of Chemistry journal article supplement (doi:10.1039/d3fo03666a), 2023-12-05

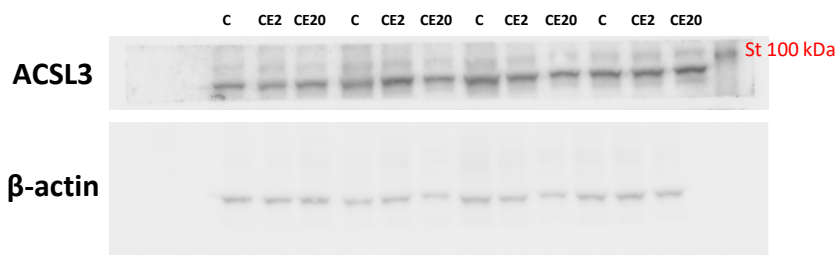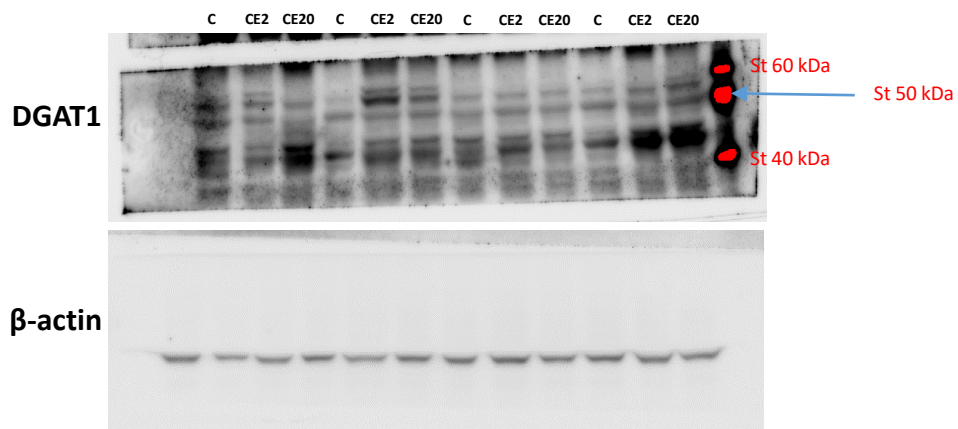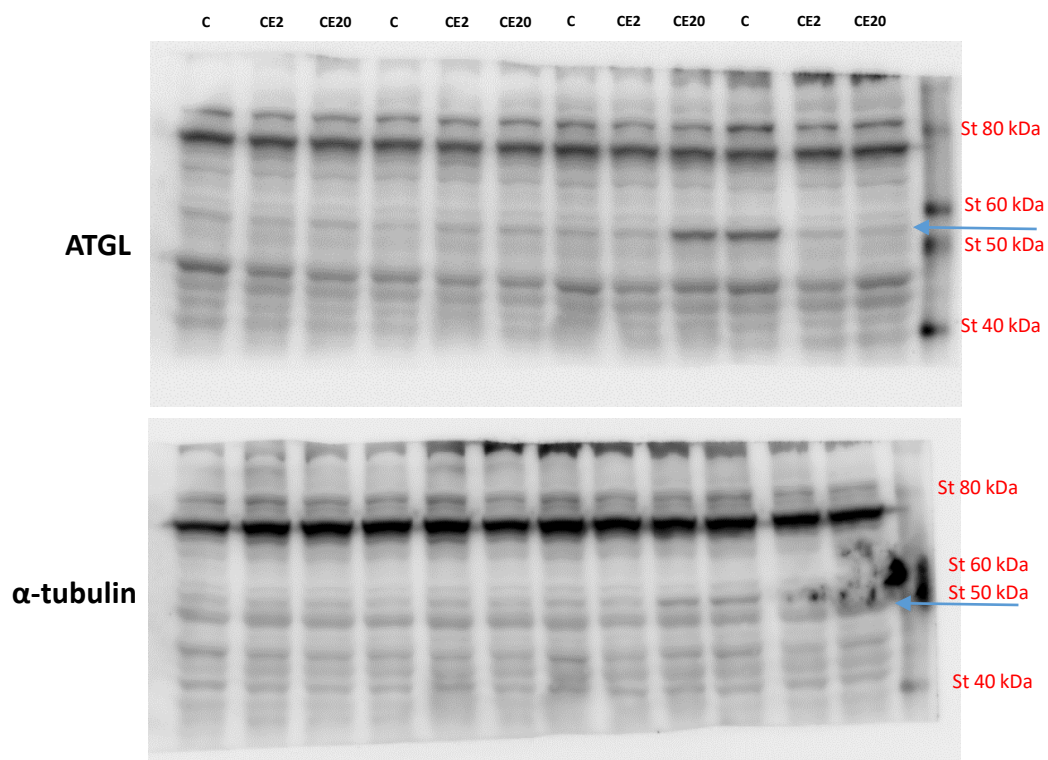

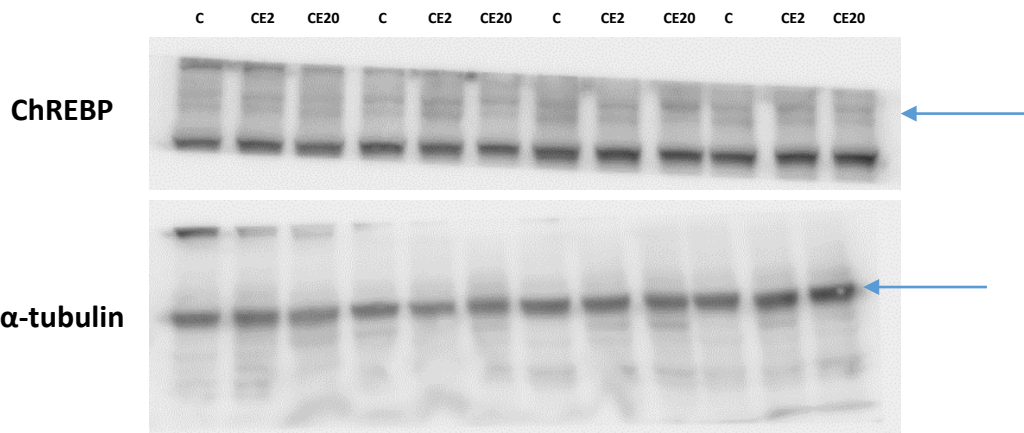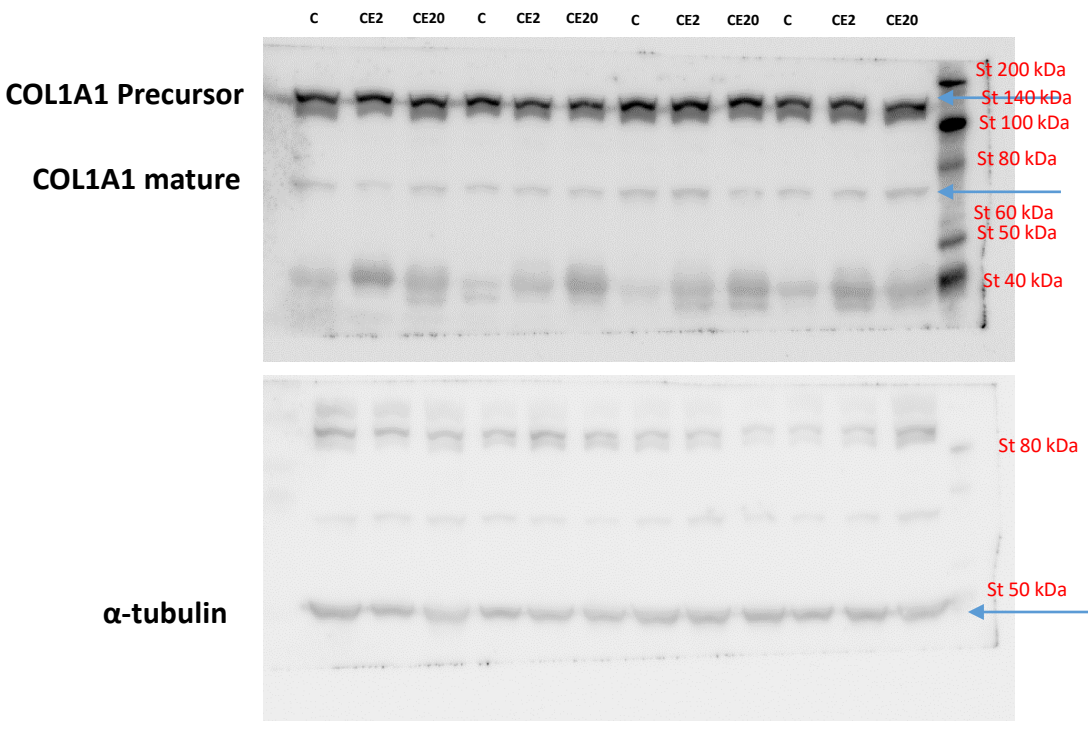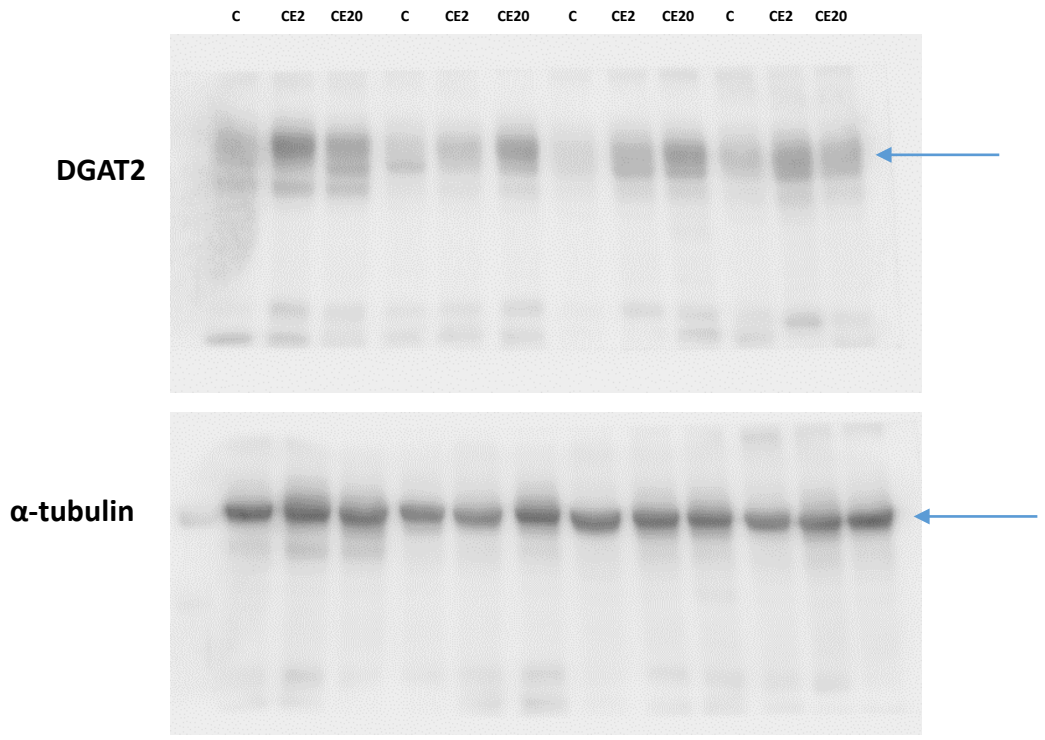

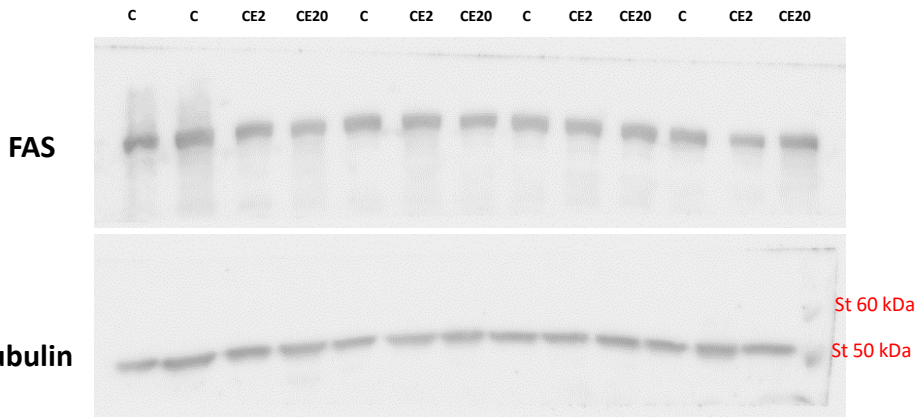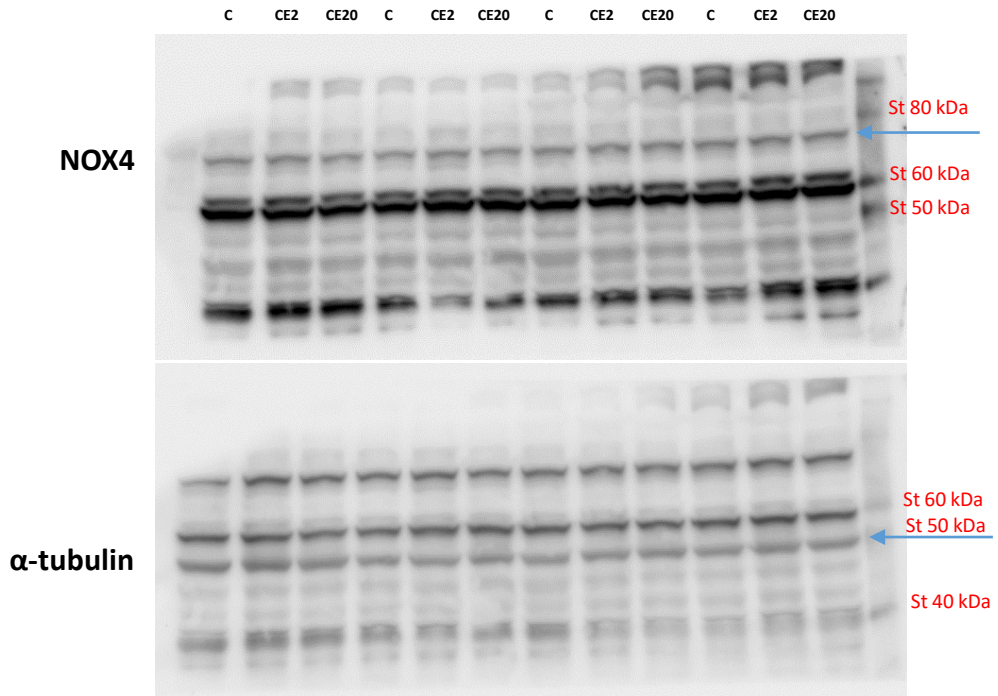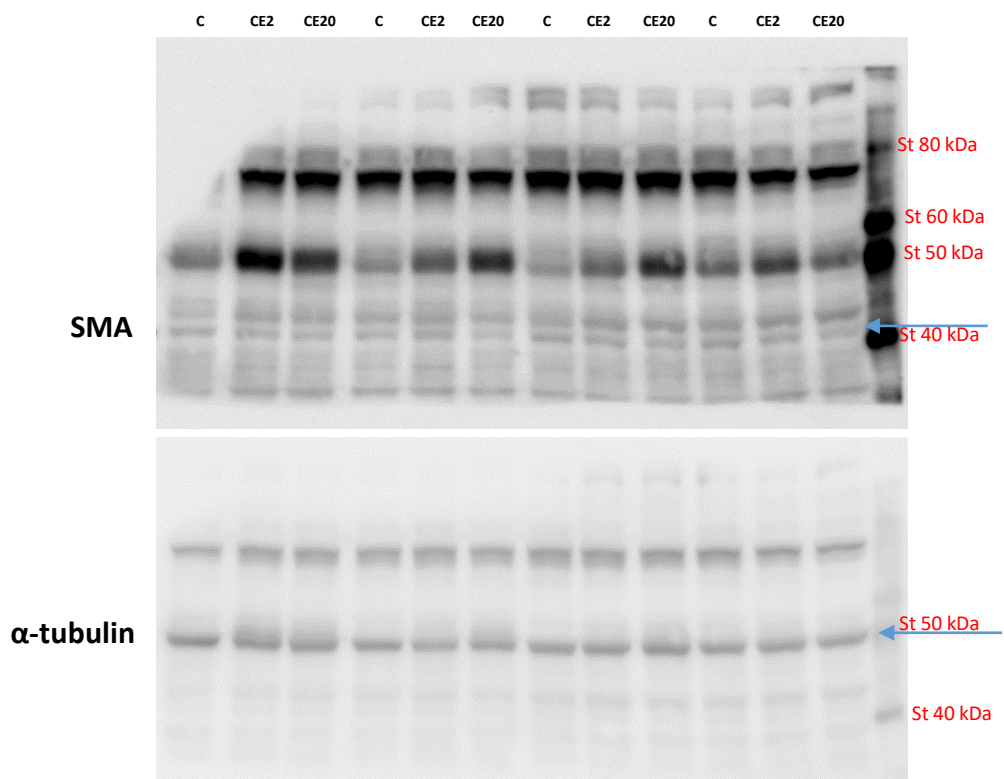

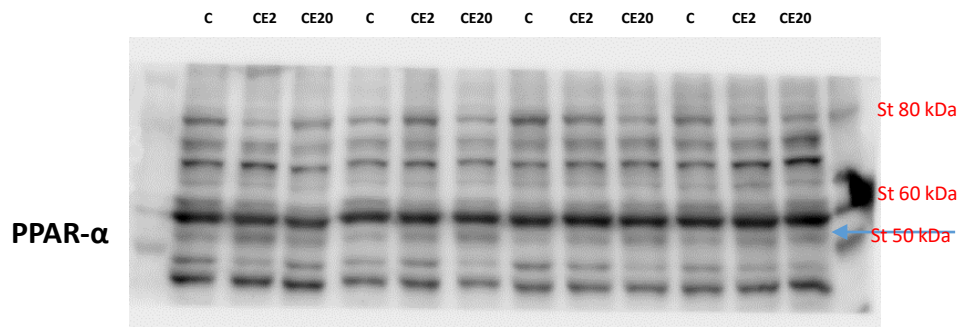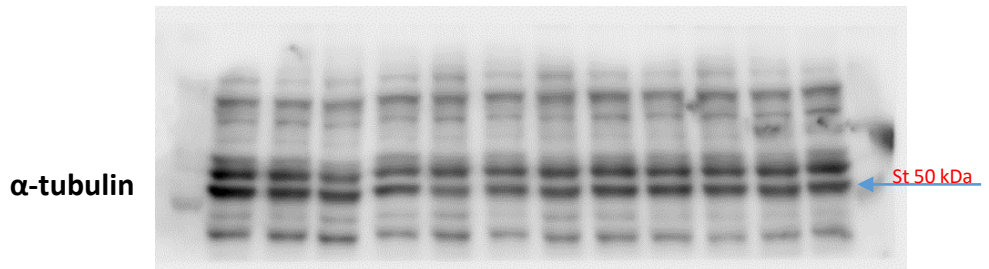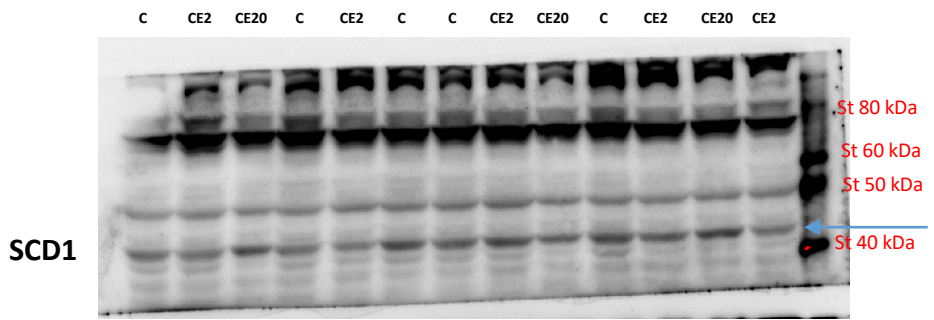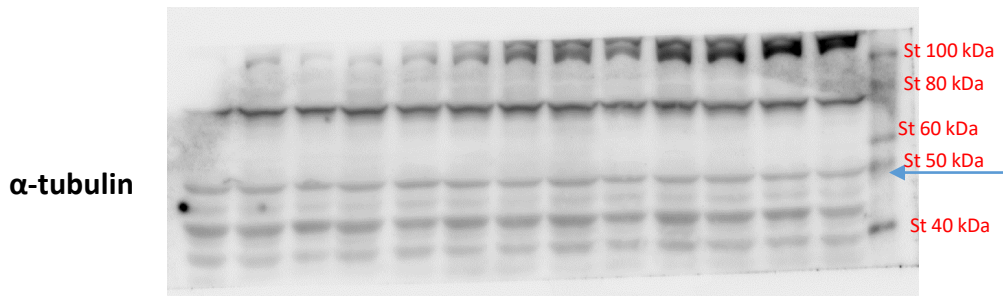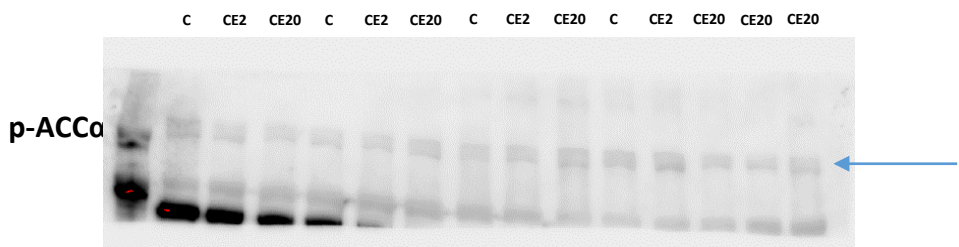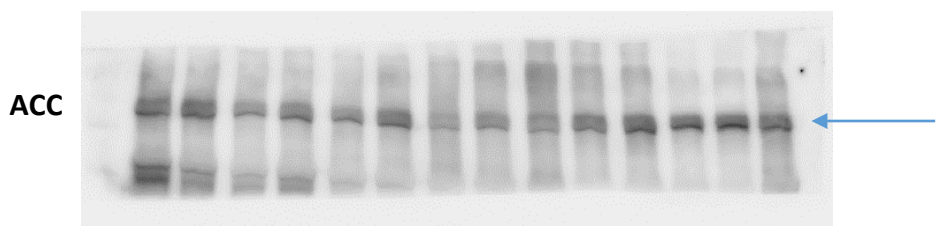

C CE2 CE20 C CE2 CE20 C CE2 CE20 C CE2 CE20

SREBP1-c Precursor

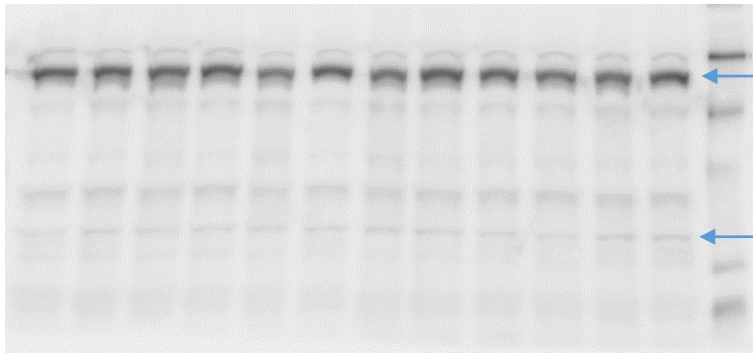

St 140 kDa  
St 100 kDa  
St 80 kDa

SREBP1-c Mature

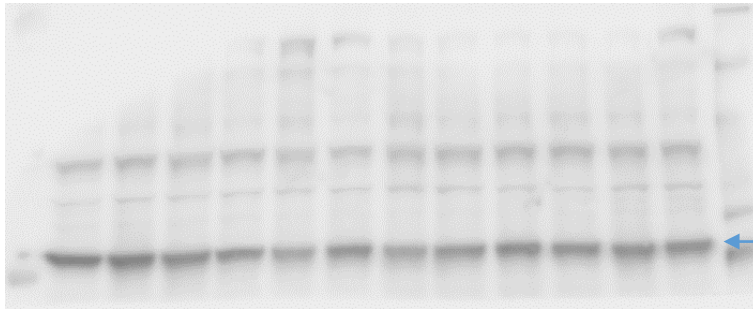

St 100 kDa  
St 80 kDa  
St 60 kDa  
St 50 kDa

$\alpha$ -tubulin

C CE2 CE20 C CE2 CE20 C CE2 CE20 C CE2 CE20

TNF- $\alpha$

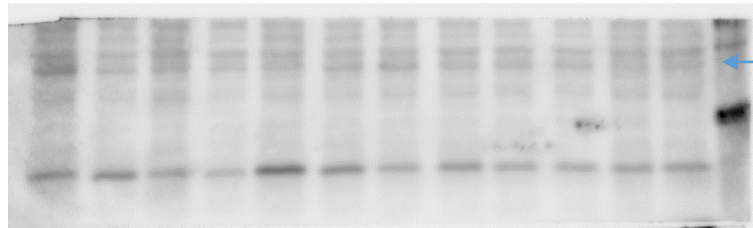

St 30 kDa  
St 20 kDa

$\beta$ -actin

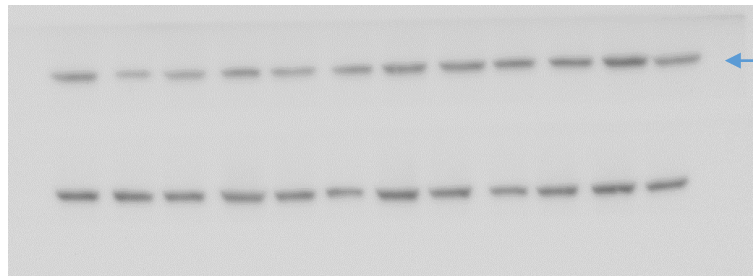

C CE2 CE20 C CE2 CE20 C CE2 CE20

NOS2

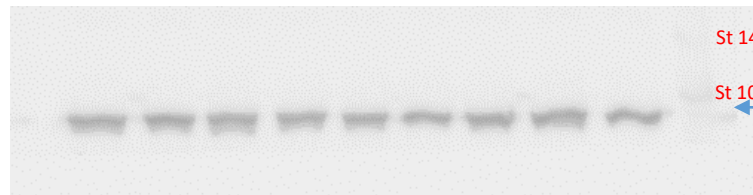

St 140 kDa  
St 100 kDa

$\alpha$ -tubulin

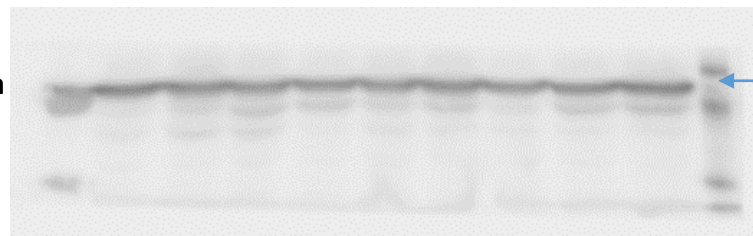

St 60 kDa  
St 50 kDa

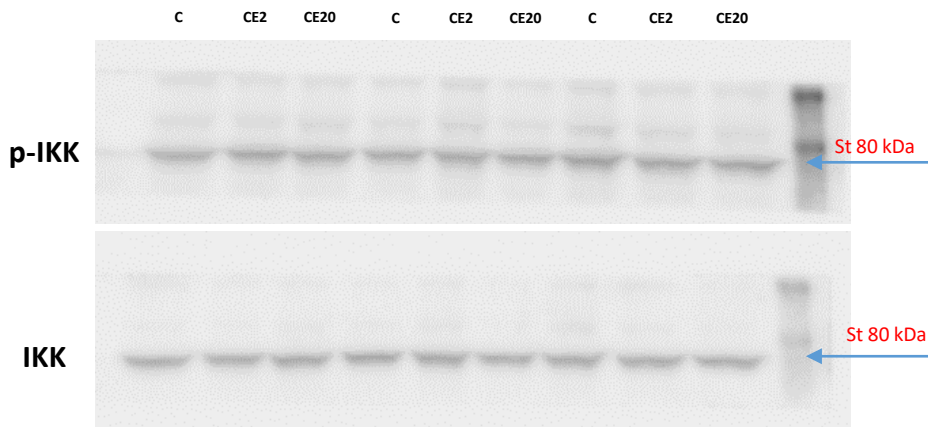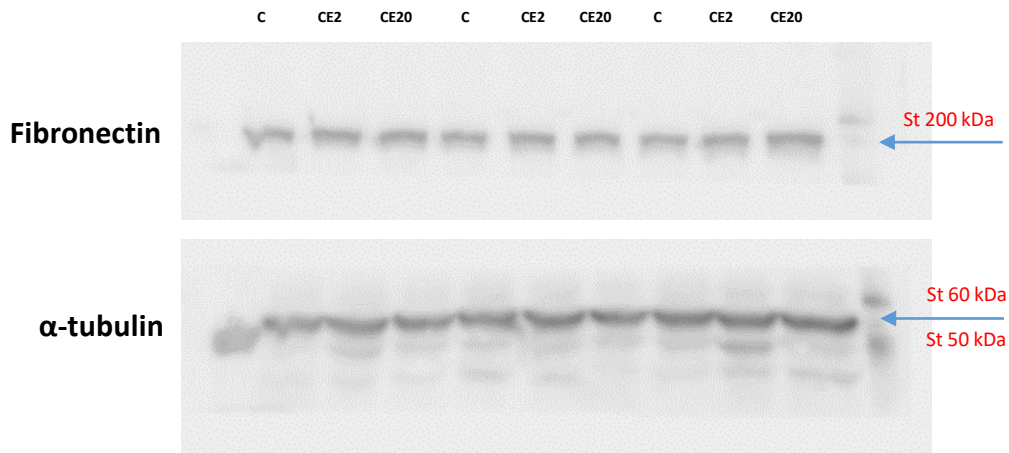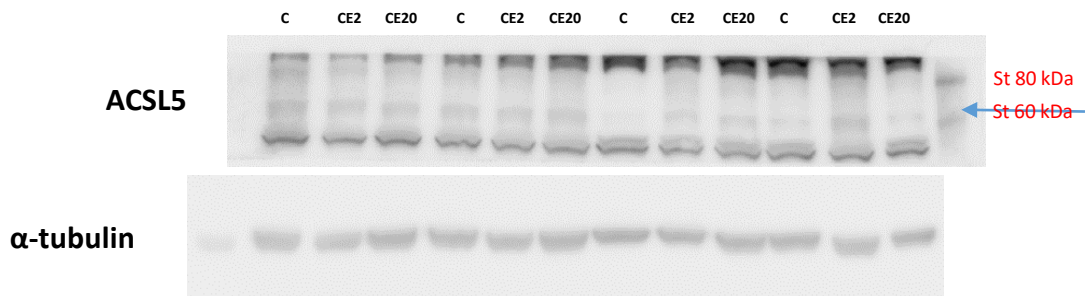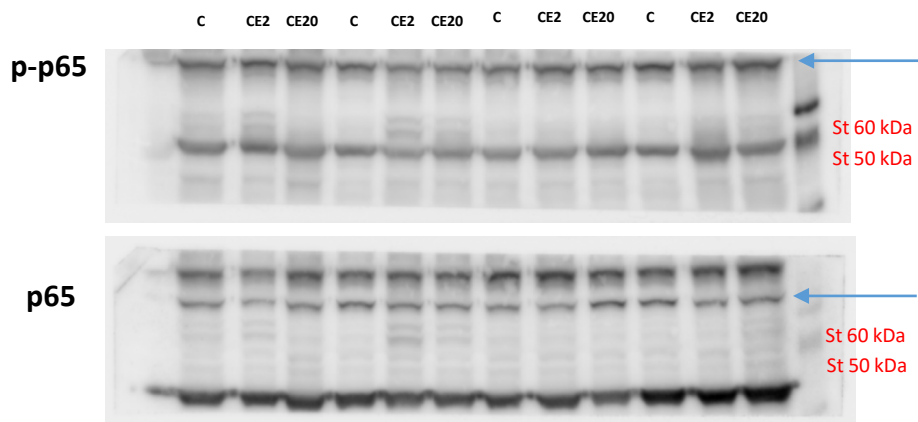

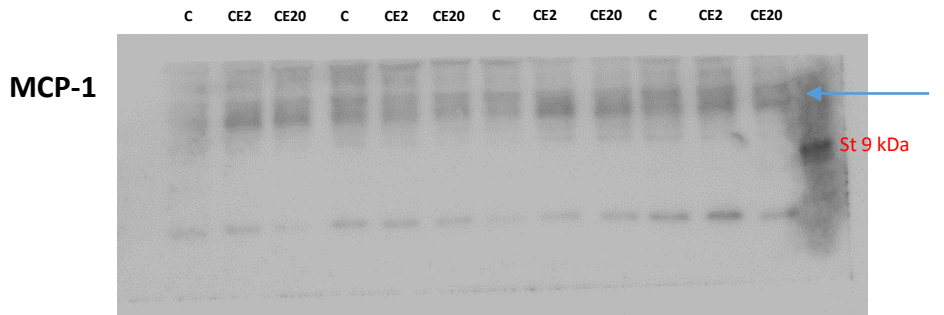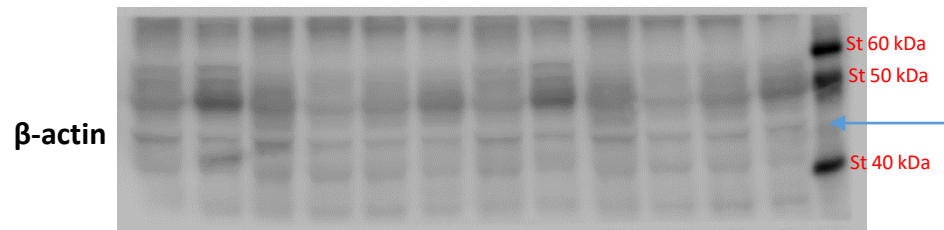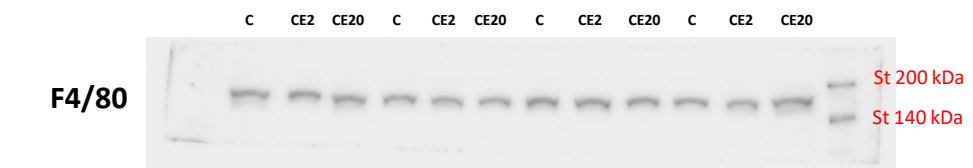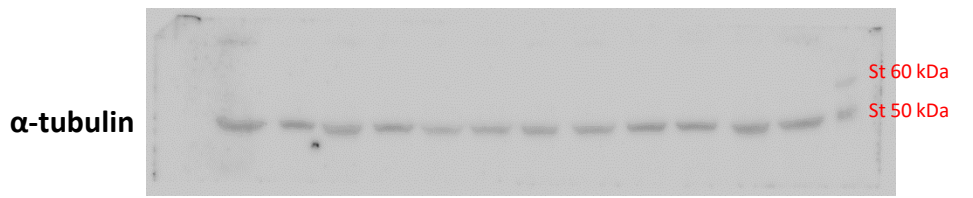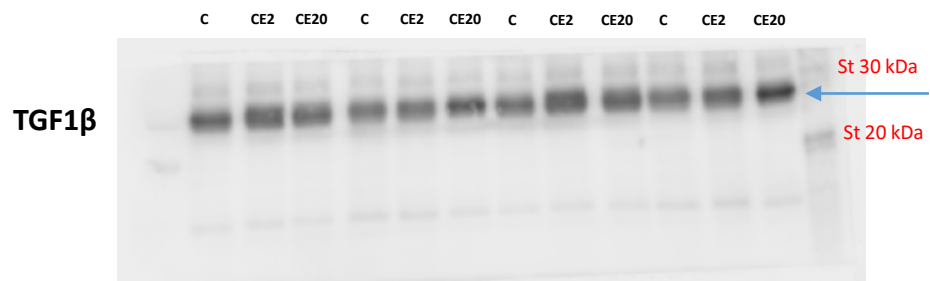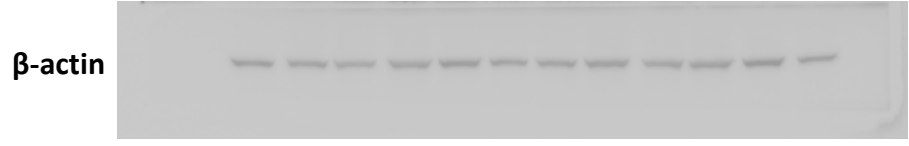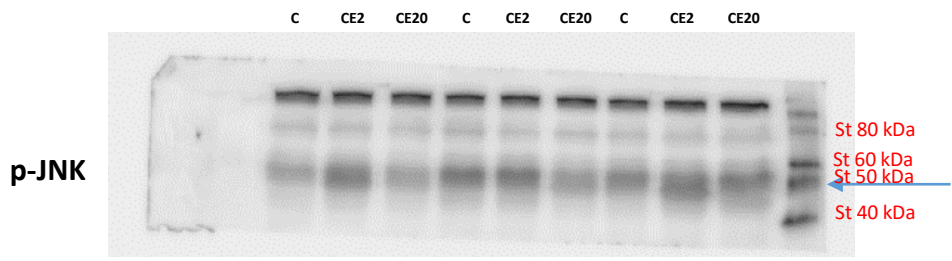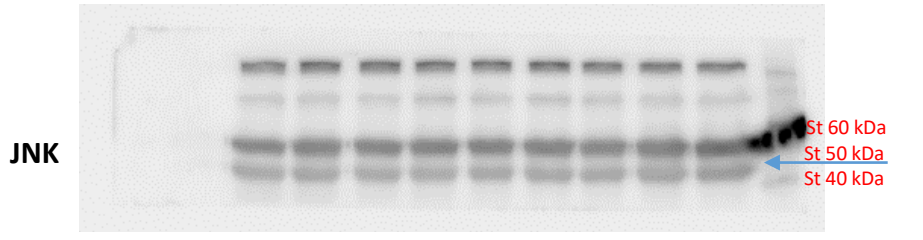

# 13-weeks animals

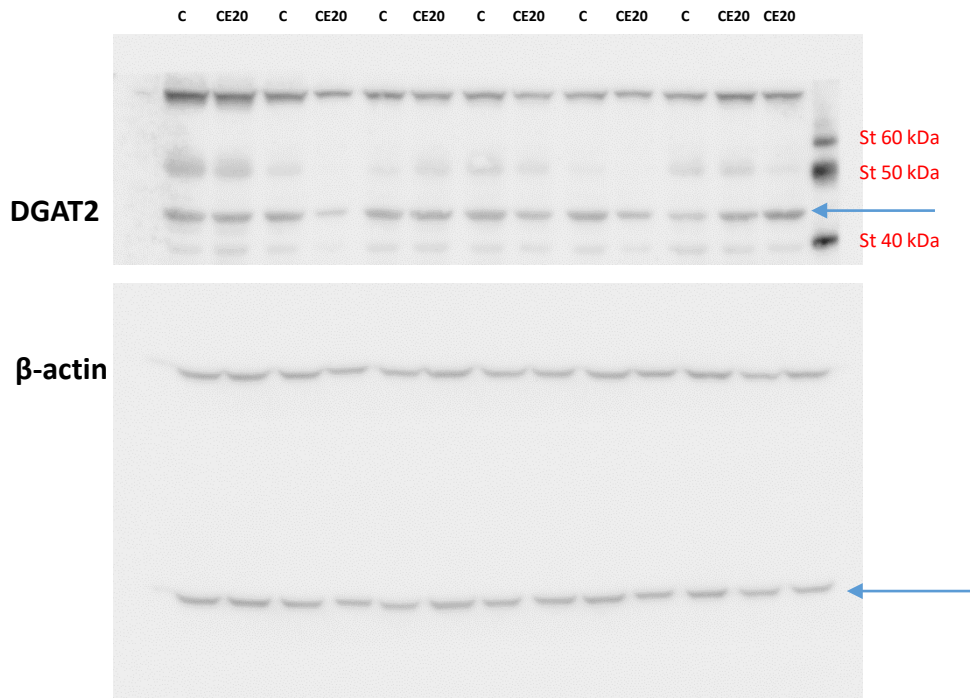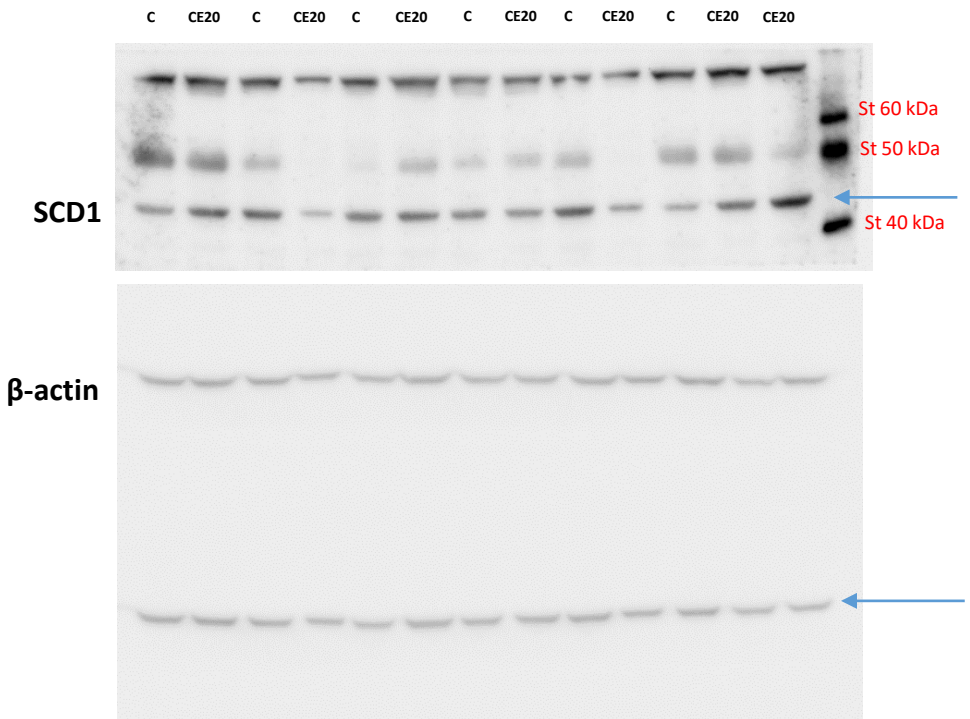

Supplement: d3fo03666a3.pdf [file d3fo03666a3.pdf]
