# Supplementary figures and images for: Effects of (−)-epicatechin on hepatic triglyceride metabolism
Source: Royal Society of Chemistry journal article supplement (doi:10.1039/d3fo03666a), 2023-12-05

## Supplemental Figure 1

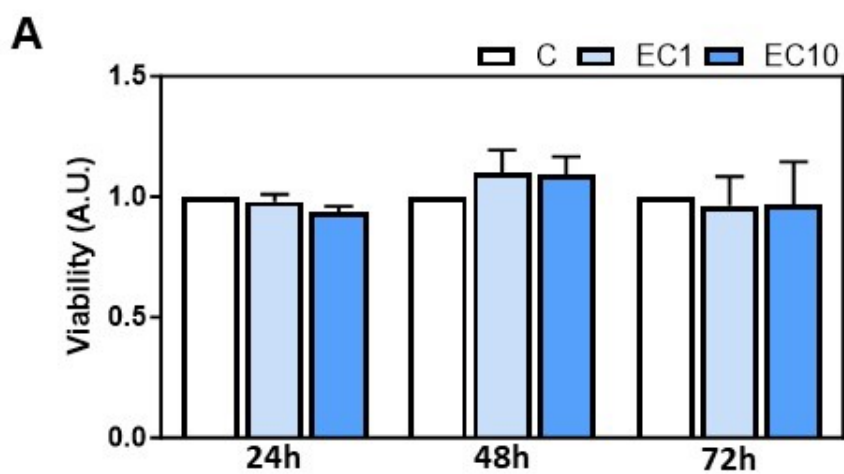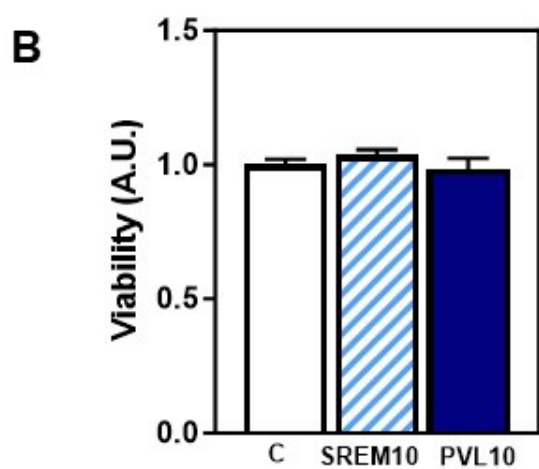

Supplement: d3fo03666a2.pdf [file d3fo03666a2.pdf]
